# Supplementary material for: The Impact of Pre-Transplant Extramedullary Disease on the Outcome of Allogeneic Hematopoietic Cell Transplantation for Acute Myeloid Leukemia in Children- on Behalf of PDWP/EBMT
Source: Research Square preprint supplement (doi:10.21203/rs.3.rs-7244803/v1), 2025-09-08
Supplement: Supplementary file 1 [file d4aff89aac9c309d7f08874c.docx]

| **Variables** | **Modalities** | **LFS** | | **OS** | | **RI** | | **NRM** | | **acute GVH III-IV** | | **CGVH** | | **GRFS** | |
| --- | --- | --- | --- | --- | --- | --- | --- | --- | --- | --- | --- | --- | --- | --- | --- |
| **HR (95% CI)** | **p value** | **HR (95% CI)** | **p value** | **HR (95% CI)** | **p value** | **HR (95% CI)** | **p value** | **HR (95% CI)** | **p value** | **HR (95% CI)** | **p value** | **HR (95% CI)** | **p value** |
| Involvement of EMD at diagnosis | BM only | 1 |  | 1 |  | 1 |  | 1 |  | 1 |  | 1 |  | 1 |  |
| BM+CNS | 1.13 (0.82- 1.54) | 0.46 | 0.96 (0.66-1.38) | 0.82 | 1.12 (0.76-1.64) | 0.57 | 1.09 (0.62-1.91) | 0.76 | 0.81 (0.42-1.54) | 0.52 | 0.90 (0.52-1.53) | 0.69 | 1.11 (0.82-1.49) | 0.5 |
| BM+Other (+/- CNS) | 1.19 (0.87-1.63) | 0.28 | 1.17 (0.83-1.65) | 0.38 | 1.45 (1.01-2.06) | **0.04** | 0.61 (0.29-1.29) | 0.2 | 0.69 (0.36-1.33) | 0.27 | 0.82 (0.48-1.43) | 0.49 | 1.04 (0.78-1.39) | 0.78 |
| Lansky | < 90 | 1 |  | 1 |  | 1 |  | 1 |  | 1 |  | 1 |  | 1 |  |
| >= 90 | 0.79 (0.60-1.03) | 0.08 | 0.77 (0.58-1.03) | 0.08 | 0.89 (0.63-1.26) | 0.5 | 0.66 (0.42-1.03) | 0.07 | 1.30 (0.70-2.41) | 0.41 | 1.16 (0.69-1.93) | 0.58 | 0.84 (0.64-1.1) | 0.21 |
| Age at transplant | (2,12] | 1 |  | 1 |  | 1 |  | 1 |  | 1 |  | 1 |  | 1 |  |
| (0,2] | 0.98 (0.70-1.37) | 0.88 | 0.95 (0.65- .40) | 0.81 | 0.95 (0.64-1.39) | 0.78 | 1.04 (0.52-2.10) | 0.9 | 0.99 (0.54-1.81) | 0.97 | 0.78 (0.42-1.43) | 0.42 | 1.07 (0.80-1.44) | 0.64 |
| (12,18] | 1.30 (1.02-1.66) | **0.03** | 1.53 (1.17- .00) | **0.002** | 0.88 (0.65-1.20) | 0.42 | 2.83 (1.82-4.41) | **<0.001** | 1.05 (0.66-1.67) | 0.82 | 2.02 (1.40-2.93) | **<0.001** | 1.41 (1.13-1.76) | **0.002** |
| Disease status at transplant | CR1 | 1 |  | 1 |  | 1 |  | 1 |  | 1 |  | 1 |  |  |  |
| CR2 | 1.54 (1.21-1.95) | **<0.001** | 1.62 (1.24-2.11) | **<0.001** | 1.55 (1.16-2.08) | **0.003** | 1.41 (0.92-2.18) | 0.12 | 1.09 (0.67-1.76) | 0.74 | 1.91 (1.30-2.81) | **<0.001** | 1.46 (1.16-1.82) | **<0.001** |
| Donor type | MRD | 1 |  | 1 |  | 1 |  | 1 |  | 1 |  | 1 |  | 1 |  |
| Mismatched relative | 1.17 (0.79-1.73) | 0.43 | 1.47 (0.96-2.24) | 0.07 | 0.62 (0.35-1.09) | 0.09 | 3.66 (1.93-6.93) | **<0.001** | 1.02 (0.47-2.22) | 0.95 | 1.80 (0.91-3.57) | 0.09 | 1.16 (0.79-1.71) | 0.44 |
| MUD | 0.75 (0.56-0.99) | **0.04** | 0.86 (0.63-1.17) | 0.34 | 0.62 (0.44-0.86) | **0.004** | 1.29 (0.73-2.31) | 0.38 | 0.81 (0.47-1.38) | 0.43 | 1.08 (0.69-1.67) | 0.74 | 0.81 (0.62-1.04) | 0.1 |
| MMUD | 0.98 (0.74-1.30) | 0.9 | 1.06 (0.77-1.46) | 0.71 | 0.67 (0.48-0.94) | **0.02** | 2.55 (1.47-4.42) | **<0.001** | 1.06 (0.63-1.79) | 0.84 | 1.25 (0.78-2.00) | 0.35 | 1.00 (0.77-1.3) | 0.98 |
| Cytogenetic classification | Good | 1 |  | 1 |  | 1 |  | 1 |  | 1 |  | 1 |  | 1 |  |
| Intermediate | 1.39 (0.97-2.00) | 0.07 | 1.47 (0.98-2.21) | 0.06 | 1.49 (0.96-2.32) | 0.07 | 1.21 (0.64-2.26) | 0.56 | 1.07 (0.56-2.05) | 0.83 | 1.06 (0.62-1.81) | 0.84 | 1.38 (1.00-1.92) | 0.05 |
| Poor | 1.69 (1.16-2.46) | **0.007** | 1.89 (1.23-2.89) | **0.004** | 1.67 (1.05-2.65) | **0.03** | 1.70 (0.88-3.29) | 0.12 | 1.07 (0.53-2.14) | 0.86 | 1.39 (0.78-2.46) | 0.26 | 1.49 (1.05-2.11) | **0.03** |
| Year of transplant (effect for 5y) | | 1.10 (0.88-1.37) | 0.42 | 1.01 (0.78-1.29) | 0.96 | 1.24 (0.95-1.63) | 0.12 | 0.80 (0.53-1.20) | 0.28 | 0.72 (0.47-1.08) | 0.11 | 0.85 (0.60-1.21) | 0.37 | 0.98 (0.80-1.20) | 0.83 |

Table 2. Multivariate analysis for survival outcomes in paediatric patients with AML.

*LFS* leukaemia-free survival, *OS* overall survival, *RI* relapse incidence, *GVH* graft-versus-host, *CGVH* chronic graft-versus-host-disease, *GRFS*, graft-versus-host-disease relapse-free survival, *HR* hazard ration, *CR1* first complete remission, *CR2* second complete remission, *MRD* matched unrelated donor, *MUD* matched unrelated donor, *MMUD* mismatched unrelated donor.
