# Supplementary material for: The Impact of Pre-Transplant Extramedullary Disease on the Outcome of Allogeneic Hematopoietic Cell Transplantation for Acute Myeloid Leukemia in Children- on Behalf of PDWP/EBMT
Source: Research Square preprint supplement (doi:10.21203/rs.3.rs-7244803/v1), 2025-09-08
Supplement: Supplementary file 2 [file dd2b0735788c976adaa16db9.docx]

**Table 1**

| **Variables** | **Modalities** | **N=958** | **BM only (N=685)**  Group A | **BM+CNS (N=135)**  Group B | **BM+other sites (+/-CNS) (N=138)**  Group C | **Test p-value** |
| --- | --- | --- | --- | --- | --- | --- |
| EMD at diagnosis | BM only | 685 (71.5) | 685 (100) | 0 (0) | 0 (0) | Not tested |
| BM+CNS | 135 (14.1) | 0 (0) | 135 (100) | 0 (0) |  |
| BM+CNS+other sites | 37 (3.9) | 0 (0) | 0 (0) | 37 (26.8) |  |
| BM+Other (not CNS) | 101 (10.5) | 0 (0) | 0 (0) | 101 (73.2) |  |
| Age at diagnosis | median [IQR] | 7.4 [2.1-12.4] | 8.4 [2.5-12.8] | 6.1 [1.3-11.5] | 3.7 [1-8.3] | **< 0.001** |
| (range) | (0-17.7) | (0-17.7) | (0-17.1) | (0-17.5) |  |
| missing | 3 | 3 | 0 | 0 |  |
| Age at transplant | median [IQR] | 8.3 [2.9-13.3] | 9.2 [3.4-13.6] | 6.6 [2.2-12.1] | 4.8 [2-10.3] | **< 0.001** |
| (range) | (0.4-18) | (0.4-18) | (0.4-17.7) | (0.4-17.9) |  |
| Age at transplant | (0,2] | 157 (16.4) | 92 (13.4) | 31 (23) | 34 (24.6) | **< 0.001** |
| (2,12] | 491 (51.3) | 345 (50.4) | 69 (51.1) | 77 (55.8) |  |
| (12,18] | 310 (32.4) | 248 (36.2) | 35 (25.9) | 27 (19.6) |  |
| Months between diag and TX | median [IQR] | 5.7 [4.3-12.6] | 5.6 [4.3-11.7] | 5.6 [4.2-13.7] | 6.3 [4.6-14.6] | 0.13 |
| (range) | (0.9-185.3) | (0.9-135.1) | (2.5-54.5) | (2.8-185.3) |  |
| missing | 3 | 3 | 0 | 0 |  |
| Disease status at transplant | CR1 | 654 (68.3) | 485 (70.8) | 86 (63.7) | 83 (60.1) | **0.02** |
| CR2 | 304 (31.7) | 200 (29.2) | 49 (36.3) | 55 (39.9) |  |
| Year of transplant | median [IQR] | 2013 [2010-2015] | 2013 [2010-2014] | 2013 [2011-2015] | 2013 [2010-2015] | 0.23 |
| (range) | (2008-2016) | (2008-2016) | (2008-2016) | (2008-2016) |  |
| Patient sex | Female | 428 (44.7) | 327 (47.8) | 50 (37) | 51 (37) | **0.01** |
| Male | 529 (55.3) | 357 (52.2) | 85 (63) | 87 (63) |  |
| missing | 1 | 1 | 0 | 0 |  |
| Cyto AML classification | Favourable | 133 (13.9) | 91 (13.3) | 19 (14.1) | 23 (16.7) | 0.8 |
| Intermediate | 486 (50.7) | 354 (51.7) | 65 (48.1) | 67 (48.6) |  |
| Adverse | 339 (35.4) | 240 (35) | 51 (37.8) | 48 (34.8) |  |
| Cytogenetic abn group | t(8;21) | 93 (9.7) | 67 (9.8) | 10 (7.4) | 16 (11.6) | Not done |
| inv(16) | 40 (4.2) | 24 (3.5) | 9 (6.7) | 7 (5.1) |  |
| Normal K | 300 (31.3) | 224 (32.7) | 38 (28.1) | 38 (27.5) |  |
| Other interm abn | 124 (12.9) | 89 (13) | 19 (14.1) | 16 (11.6) |  |
| t(9;11) | 62 (6.5) | 41 (6) | 8 (5.9) | 13 (9.4) |  |
| abn(11q23) not t(9;11) | 160 (16.7) | 99 (14.5) | 30 (22.2) | 31 (22.5) |  |
| inv(3) | 1 (0.1) | 0 (0) | 0 (0) | 1 (0.7) |  |
| mono(7;5;5q) | 50 (5.2) | 39 (5.7) | 7 (5.2) | 4 (2.9) |  |
| t(6;9) | 19 (2) | 18 (2.6) | 1 (0.7) | 0 (0) |  |
| t(9;22) | 7 (0.7) | 5 (0.7) | 1 (0.7) | 1 (0.7) |  |
| complex/monossomal | 102 (10.6) | 79 (11.5) | 12 (8.9) | 11 (8) |  |
| Donor type | Identical sibling | 313 (32.7) | 225 (32.8) | 50 (37) | 38 (27.5) | Not tested |
| Matched other relative | 21 (2.2) | 14 (2) | 1 (0.7) | 6 (4.3) |  |
| Haploidentical | 75 (7.8) | 56 (8.2) | 12 (8.9) | 7 (5.1) |  |
| Relative mismatch on 1 locus | 6 (0.6) | 5 (0.7) | 0 (0) | 1 (0.7) |  |
| UD 10/10 (A, B, C, BRB1 and DQB1) | 257 (26.8) | 188 (27.4) | 35 (25.9) | 34 (24.6) |  |
| UD <=9/10 (A, B, C, BRB1 and DQB1) | 136 (14.2) | 92 (13.4) | 12 (8.9) | 32 (23.2) |  |
| UCB 6/6 (A and B 2 digits ; DR 4 digits) | 24 (2.5) | 17 (2.5) | 7 (5.2) | 0 (0) |  |
| UCB <=5/6 (A and B 2 digits ; DR 4 digits) | 126 (13.2) | 88 (12.8) | 18 (13.3) | 20 (14.5) |  |
| Source of cells | BM | 572 (59.7) | 410 (59.9) | 77 (57) | 85 (61.6) | 0.88 |
| PB | 236 (24.6) | 170 (24.8) | 33 (24.4) | 33 (23.9) |  |
| CB (including double CB) | 150 (15.7) | 105 (15.3) | 25 (18.5) | 20 (14.5) |  |
| Lansky | < 90 | 160 (17.8) | 107 (16.6) | 24 (19) | 29 (22.8) | 0.23 |
| >= 90 | 737 (82.2) | 537 (83.4) | 102 (81) | 98 (77.2) |  |
| missing | 61 | 41 | 9 | 11 |  |
| Ex-vivo TCD | No | 805 (87.6) | 572 (86.9) | 109 (87.2) | 124 (91.2) | 0.39 |
| Yes | 114 (12.4) | 86 (13.1) | 16 (12.8) | 12 (8.8) |  |
| missing | 39 | 27 | 10 | 2 |  |
| Invivo TCD | No | 436 (47) | 308 (46.8) | 70 (52.2) | 58 (43) | Not tested |
| ATG | 440 (47.5) | 309 (47) | 63 (47) | 68 (50.4) |  |
| Campath | 51 (5.5) | 41 (6.2) | 1 (0.7) | 9 (6.7) |  |
| missing | 31 | 27 | 1 | 3 |  |
| Myeloablative regimen | No | 33 (3.5) | 22 (3.2) | 3 (2.3) | 8 (5.8) | Not tested |
| Yes | 914 (96.5) | 655 (96.8) | 129 (97.7) | 130 (94.2) |  |
| missing | 11 | 8 | 3 | 0 |  |
| Conditioning regimen | BuCy based | 414 (43.4) | 280 (41.1) | 71 (53) | 63 (45.7) | Not tested |
| BuCyMel based | 287 (30.1) | 229 (33.6) | 18 (13.4) | 40 (29) |  |
| BuFlu based | 147 (15.4) | 107 (15.7) | 23 (17.2) | 17 (12.3) |  |
| BuMel based | 8 (0.8) | 5 (0.7) | 0 (0) | 3 (2.2) |  |
| Treo based | 29 (3) | 16 (2.3) | 9 (6.7) | 4 (2.9) |  |
| TreoFluThio based | 39 (4.1) | 27 (4) | 7 (5.2) | 5 (3.6) |  |
| FluMel based | 19 (2) | 11 (1.6) | 6 (4.5) | 2 (1.4) |  |
| Other combinations | 10 (1) | 6 (0.9) | 0 (0) | 4 (2.9) |  |
| missing | 5 | 4 | 1 | 0 |  |
| GVHD prophilaxis | CSA | 844 (91.1) | 607 (92.7) | 117 (87.1) | 120 (88.9) | Not tested |
| MMF+TACRO | 27 (2.8) | 13 (2) | 7 (5.2) | 7 (5.1) |  |
| Other | 44 (4.7) | 36 (5.5) | 10 (7.4) | 8 (5.9) |  |
| missing | 33 | 29 | 1 | 3 |  |

Table 1: Patients with AML in CR and transplant characteristics.

*EMD* extramedullary disease, *BM* bone marrow, *CNS* central nervous system, *TX* transplant, *CR1* first clinical remission, *CR2* second clinical remission, *UD* unrelated donor, *UCB* unrelated cord blood, *MRD* matched related donor, *MUD* matched unrelated donor, *PB* peripheral blood, *CB* cord blood, *TCD* T-cell depletion, *BU* busulfan, *TREO* treosulfan, *GVHD* graft-versus-host-disease, *CSA* cyclosporine.
